# Supplementary material
Source: publisher site journal article supplement (https://www.dovepress.com/article/590525)

**Supplementary Table 1. Baseline characteristics of the enrolled women**

|                                                  | Induced labor<br>(n = 192) | Spontaneous<br>labor (n = 8) |
|--------------------------------------------------|----------------------------|------------------------------|
| Maternal age, year                               | 31.16± 3.31                | 28.13± 2.90                  |
| Parity                                           |                            |                              |
| Nulliparity                                      | 159 (82.8)                 | 8 (100.0)                    |
| Parity=1                                         | 33 (17.2)                  | 0 (0.0)                      |
| Maternal height, cm                              | 162.40± 5.17               | 163.00± 6.19                 |
| Gestational age at delivery                      |                            |                              |
| 37 weeks 0 days to 37 weeks 6 days               | 3 (1.6)                    | 1 (12.5)                     |
| 38 weeks 0 days to 38 weeks 6 days               | 18 (9.4)                   | 0 (0.0)                      |
| 39 weeks 0 days to 39 weeks 6 days               | 69 (35.9)                  | 1 (12.5)                     |
| 40 weeks 0 days to 40 weeks 6 days               | 95 (49.5)                  | 6 (75.0)                     |
| 41 weeks 0 days to 41 weeks 6 days               | 7 (3.6)                    | 0 (0.0)                      |
| Reason for induction                             |                            |                              |
| Beyond 40 weeks of gestational age               | 69 (35.9)                  | 5 (62.5)                     |
| Pre-gestational or gestational diabetes mellitus | 20 (10.4)                  | 1 (12.5)                     |
| Hypertensive disorders in pregnancy              | 5 (2.6)                    | 0 (0.0)                      |
| Other maternal factors                           | 16 (8.3)                   | 0 (0.0)                      |
| Oligohydramnios                                  | 35 (18.2)                  | 0 (0.0)                      |
| Premature rupture of membranes                   | 17 (8.9)                   | 2 (25.0)                     |
| Other fetal factors                              | 5 (2.6)                    | 0 (0.0)                      |
| Maternal request                                 | 25 (13.0)                  | 0 (0.0)                      |
| Bishop score, median (IQR)                       | 4.00 (4.00, 5.00)          | 5.00 (5.00, 6.00)            |
| Cervical length, cm                              | 1.72± 0.87                 | 1.13± 0.55                   |
| Fetal station, cm                                | -1.72± 0.78                | -1.35± 0.56                  |
| Cervical position                                |                            |                              |
| Anterior                                         | 1 (0.5)                    | 0 (0.0)                      |
| Central                                          | 156 (81.3)                 | 8 (100.0)                    |
| Posterior                                        | 35 (18.2)                  | 0 (0.0)                      |
| Cervical consistency                             |                            |                              |
| Soft                                             | 42 (21.9)                  | 1 (12.5)                     |
| Medium                                           | 148 (77.1)                 | 7 (87.5)                     |
| Hard                                             | 2 (1.0)                    | 0 (0.0)                      |

Data are presented as n (%) or mean ± standard deviation unless otherwise specified.

Abbreviations: IQR, interquartile range.

**Supplementary Table 2. Univariate and multivariable analyses of VD24 in nulliparous women**

| Variables            | Univariate          |         | Multivariable       |         |
|----------------------|---------------------|---------|---------------------|---------|
|                      | Odds ratio (95% CI) | P-value | Odds ratio (95% CI) | P-value |
| Cervical length, cm  | 0.13 (0.06, 0.29)   | <0.001  | 0.30 (0.11, 0.81)   | 0.018   |
| Fetal station, cm    | 9.09 (4.16, 19.86)  | <0.001  | 4.43 (1.63, 12.04)  | 0.003   |
| Cervical position    |                     |         |                     |         |
| Posterior            | Ref                 |         | Ref                 |         |
| Central              | 1.29 (0.52, 3.18)   | 0.580   | 1.86 (0.53, 6.55)   | 0.333   |
| Anterior             | -                   | -       | -                   | -       |
| Cervical consistency |                     |         |                     |         |
| Soft                 | Ref                 |         | Ref                 |         |
| Medium               | 0.64 (0.28, 1.48)   | 0.298   | 0.81 (0.27, 2.42)   | 0.705   |
| Hard                 | -                   | -       | -                   | -       |
| Bishop score         | 1.22 (0.90, 1.66)   | 0.197   |                     |         |

Abbreviations: VD24, vaginal delivery within 24 hours of induction of labor onset; CI, confidence interval.

**Supplementary Table 3. Univariate and multivariable analyses of VD24 in women with intact membranes**

| Variables            | Univariate          |         | Multivariable       |         |
|----------------------|---------------------|---------|---------------------|---------|
|                      | Odds ratio (95% CI) | P-value | Odds ratio (95% CI) | P-value |
| Cervical length, cm  | 0.20 (0.11, 0.36)   | <0.001  | 0.45 (0.21, 0.99)   | 0.046   |
| Fetal station, cm    | 7.35 (3.70, 14.57)  | <0.001  | 4.24 (1.80, 9.97)   | 0.001   |
| Cervical position    |                     |         |                     |         |
| Posterior            | Ref                 |         | Ref                 |         |
| Central              | 1.98 (0.80, 4.89)   | 0.138   | 0.94 (0.30, 2.96)   | 0.915   |
| Anterior             | -                   | -       | -                   | -       |
| Cervical consistency |                     |         |                     |         |
| Soft                 | Ref                 |         | Ref                 |         |
| Medium               | 0.50 (0.23, 1.10)   | 0.085   | 1.10 (0.41, 2.91)   | 0.855   |
| Hard                 | -                   | -       | -                   | -       |
| Bishop score         | 1.29 (0.97, 1.71)   | 0.085   |                     |         |

Abbreviations: VD24, vaginal delivery within 24 hours of induction of labor onset; CI, confidence interval.

**Supplementary Figure 1. Receiver operating characteristic curves for modified cervical assessment models and the Bishop score in nulliparous women.** Abbreviations: AUC: area under the curve; CL: cervical length; FS: fetal station; CP: cervical position; CC: cervical consistency.

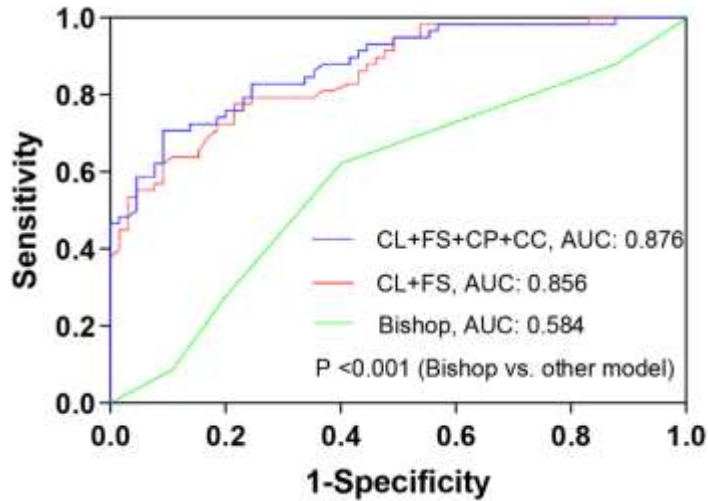

**Supplementary Figure 2. Receiver operating characteristic curves for modified cervical assessment models and the Bishop score in women with intact membranes.**

Abbreviations: AUC: area under the curve; CL: cervical length; FS: fetal station; CP: cervical position; CC: cervical consistency.

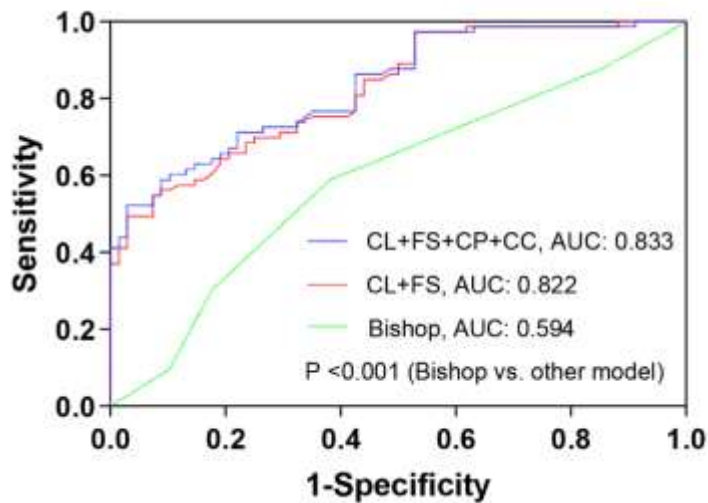

Supplement: Supplementary file 1 [file 590525%20Supplementary%20Material.pdf]
